# Supplementary material
Source: MDPI journal article supplement (https://www.mdpi.com/2673-9992/3/1/1)
Supplement: s1 [file s1]

M. Walter<sup>1</sup>, E. Homan<sup>2</sup>, T. Koolmeister<sup>2</sup>, I. Almlöf<sup>2</sup>, O. Mortusewicz<sup>2</sup>, T. Helleday<sup>1,2</sup>, and P. Herr<sup>1</sup>

<sup>1</sup>Weston Park Cancer Centre, Department of Oncology and Metabolism, University of Sheffield, S10 2RX Sheffield, UK;

<sup>2</sup>Science for Life Laboratory, Division of Translational Medicine and Chemical Biology, Department of Oncology and Pathology, Karolinska Institutet, SE-171 76 Stockholm, Sweden

## 1 Introduction

NUDT22 is a so far unstudied member of the highly diverse NUDIX protein superfamily. We previously identified a unique hydrolase activity of NUDT22 towards UDP-glucose in a family-wide biochemical substrate screen resulting in the production of uridine monophosphate (UMP) and glucose 1-phosphate (G-1-P). We furthermore solved the first co-crystal structure of NUDT22 and its substrate UDP-glucose [1].

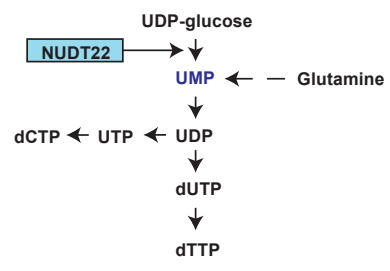

Figure 1. NUDT22 is involved in a novel pyrimidine salvage pathway

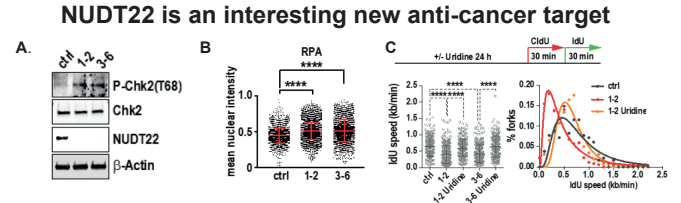

Figure 2. A. Cell cycle checkpoint activation in NUDT22 depleted cells. B. Quantification of nuclear intensity of DNA replication stress marker RPA-32 upon NUDT22 depletion. C. Changes replication fork speed upon NUDT22 depletion as determined by DNA fiber assay. Our mechanistic studies reveal increased replication stress in NUDT22 deficient U-2 OS cells which can be rescued by uridine supplementation (Fig. 2). We therefore propose the discovery of a novel NUDT22-mediated Glutamine-independent pyrimidine salvage pathway (Fig. 1).

## 2 NUDT22 gene alterations in breast cancer tissues

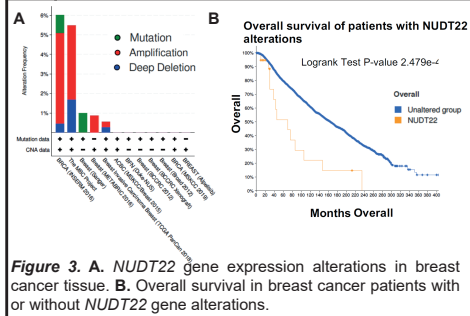

Here we analysed the TCGA database based on NUDT22 expression levels in breast cancer tissues indicating the presence of NUDT22 gene amplifications (Fig. 3A). Furthermore, overall survival is decreased in breast cancer patients with NUDT22 alterations (Fig. 3B).

## 3 Aims and Methods

Development of first-in-class NUDT22 inhibitors by computer-aided drug design (CADD).  
Experimental evaluation (Enzymatic Activity Assay on recombinant NUDT22 & Target engagement - Differential Scanning Fluorimetry/ Cellular Thermal Shift Assay)

## 4 In silico screening identifies Compound 1 as first-in-class NUDT22 inhibitor

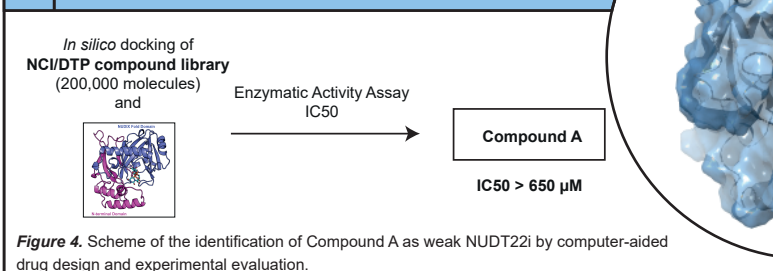

Here we proof the suitability of computer-aided drug design (CADD) to identify Compound A as first-in-class NUDT22 inhibitor. We performed an in silico docking screen of the co-crystal structure of NUDT22 and UDP-glucose [1] on the National Cancer Institute/Development Therapeutics Program (NCI/DTP) compound library on the followed by the evaluation of the top-40 compounds based on their potential to inhibit NUDT22 (Fig. 4).

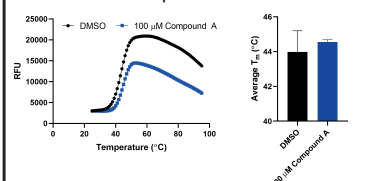

Figure 5. Differential scanning fluorimetry (DSF) was used to identify a shift in ΔTm upon Compound A binding.

We used Differential Scanning Fluorimetry (DSF) to determine whether Compound 1 stabilises recombinant NUDT22 protein. Preliminary data suggest a shift in the specific melting temperature (ΔTm) of NUDT22 of 0.5°C upon treatment with 100 μM Compound 1 and, therefore target engagement (Fig. 5).

## 5 Chemical optimisation of Inhibitor 1 results in stronger target engagement

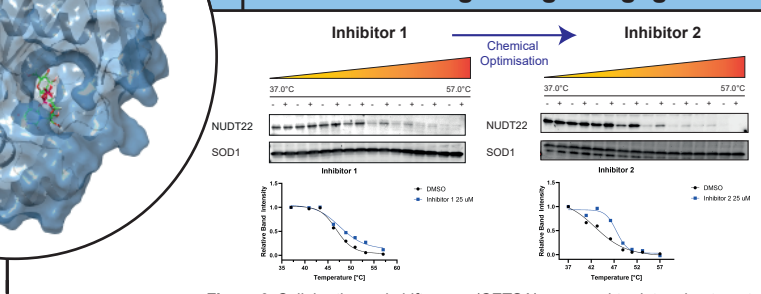

Figure 6. Cellular thermal shift assay (CETSA) was used to determine target engagement of a chemical optimised NUDT22i compared to the original Hit. A second virtual screen of an in-house compound library identified Inhibitor 1 as potential NUDT22i. Chemical optimisation of Inhibitor 1 caused an increase in cellular target engagement from ΔTm of 0.9°C to 3.5°C as determined in a cellular thermal shift assay (CETSA) in U-2 OS cell lysate (Fig. 6).

## 6 Conclusions

- We identified Compound A as first-in-class small molecule NUDT22 inhibitor by using computer-aided drug design (CADD).
- Chemical optimisation of Inhibitor 1 results in an increase in NUDT22 stabilisation and, therefore, target engagement.

## References

[1] M. Carter et al., "Human NUDT22 Is a UDP-Glucose/Galactose Hydrolase Exhibiting a Unique Structural Fold," Structure, vol. 26, no. 2, pp. 295-+, Feb 2018, doi: 10.1016/j.str.2018.01.004.
